# Supplementary material
Source: PubMed Central journal article supplement (PMC9852358)
Supplement: NIHMS1825002-supplement-1.pdf [file NIHMS1825002-supplement-1.pdf]

## SUPPLEMENTAL MATERIALS

### Search Strategy

#### PubMed:

((*gastroparesis*) AND (*epidemiology* OR *population* OR *prevalence* OR *incidence*)) AND  
 (("1900/01/01"[Date - Publication]: "2021/12/31"[Date - Publication]))

#### Web of Science:

***gastroparesis*** (All Fields) and ***epidemiology*** OR ***prevalence*** OR ***incidence*** OR ***population*** (All Fields) and **1880-2021** (Year Published)

#### Ovid MEDLINE:

- 1 *gastroparesis.mp. or exp Gastroparesis/ or exp Gastric Emptying/* (12946)
- 2 *exp Epidemiology/* (27939)
- 3 *exp Prevalence/* (323973)
- 4 *exp Incidence/* (287665)
- 5 *exp Population/* (134326)
- 6 *exp Adult/* (7706031)
- 7 *2 or 3 or 4 or 5* (725553)
- 8 *1 and 6 and 7* (168)
- 9 *limit 8 to (humans and yr="1860 - 2021")* (167)

#### Cochrane:

- 1 *gastroparesis.mp. [mp=title, short title, abstract, full text, keywords, caption text]* (23)

#### EMBASE:

- 1 *gastroparesis.mp. or exp stomach paresis/* (10350)
- 2 *gastric emptying.mp. or exp stomach emptying/* (26358)
- 3 *1 or 2* (31996)
- 4 *exp epidemiology/* (3960889)
- 5 *exp prevalence/* (871049)
- 6 *exp incidence/* (581261)
- 7 *exp population/ or exp population health/* (630716)
- 8 *exp adult/* (9604514)
- 9 *4 or 5 or 6 or 7* (4349439)
- 10 *3 and 8 and 9* (2492)
- 11 *limit 10 to (human and yr="1883 - 2021")* (2422)

**Table S1. The Joanna Briggs Institute (JBI) Critical Appraisal Checklist for Reporting Prevalence Data.**

| Question                                                                                        | Response |    |         |                |
|-------------------------------------------------------------------------------------------------|----------|----|---------|----------------|
|                                                                                                 | Yes      | No | Unclear | Not Applicable |
| 1. Was the sample frame appropriate to address the target population?                           |          |    |         |                |
| 2. Were study participants sampled in an appropriate way?                                       |          |    |         |                |
| 3. Was the sample size adequate?                                                                |          |    |         |                |
| 4. Were the study subjects and the setting described in detail?                                 |          |    |         |                |
| 5. Was the data analysis conducted with sufficient coverage of the identified sample?           |          |    |         |                |
| 6. Were valid methods used for the identification of the condition?                             |          |    |         |                |
| 7. Was the condition measured in a standard, reliable way for all participants?                 |          |    |         |                |
| 8. Was there appropriate statistical analysis?                                                  |          |    |         |                |
| 9. Was the response rate adequate, and if not, was the low response rate managed appropriately? |          |    |         |                |
